# Supplementary material for: A Multi-Centre Study to Risk Stratify Colorectal Polyp Surveillance Patients Utilising Volatile Organic Compounds and Faecal Immunochemical Test
Source: MDPI journal article supplement (doi:10.3390/cancers14194951), 2022-10-09
Supplement: s1 [file s1]

**In serial testing****2x2 table for VOC**

|       | Disease<br>+ | Disease<br>- | Total |
|-------|--------------|--------------|-------|
| VOC + | 244          | 230          | 474   |
| VOC - | 16           | 510          | 526   |
| Total | 260          | 740          | 1000  |

**2x2 table for FIT**

|       | Disease<br>+ | Disease<br>- | Total |
|-------|--------------|--------------|-------|
| FIT + | 9            | 107          | 116   |
| FIT - | 7            | 403          | 410   |
| Total | 16           | 510          | 526   |

Prevalence = 26%

Number of patients with a high-risk finding per 1000 = 260

Therefore, patients without a high-risk finding = 1000-260 = 740

Sensitivity = TP/Disease positive

**For VOC**

$$0.92 = TP/260 = 239$$

$$0.62 = TN / 740 = 459$$

**For FIT**

$$0.54 = TP / 16 = 9$$
